# Supplementary material for: First report on the electrooxidation of vinpocetine using a modification free sensing platform: application to pharmaceutical formulations
Source: Royal Society of Chemistry journal article supplement (doi:10.1039/d4ay00598h), 2024-01-01
Supplement: d4ay00598h1.pdf [file d4ay00598h1.pdf]

**First report on the electrooxidation of vinpocetine using a modification free sensing platform: application to pharmaceutical formulations**

**Adriano Rogerio Silva Lima, Gabriel Chitolina Rodrigues, Alan Carlos Rezende Rodrigues, Caio Raphael Vanoni, Gustavo Amadeu Micke, Giovanni Finoto Caramori, Ricardo Ferreira Affeldt, Glaucio Régis Nagurniak, and Cristiane Luisa Jost**

**SUPPLEMENTARY INFORMATION**

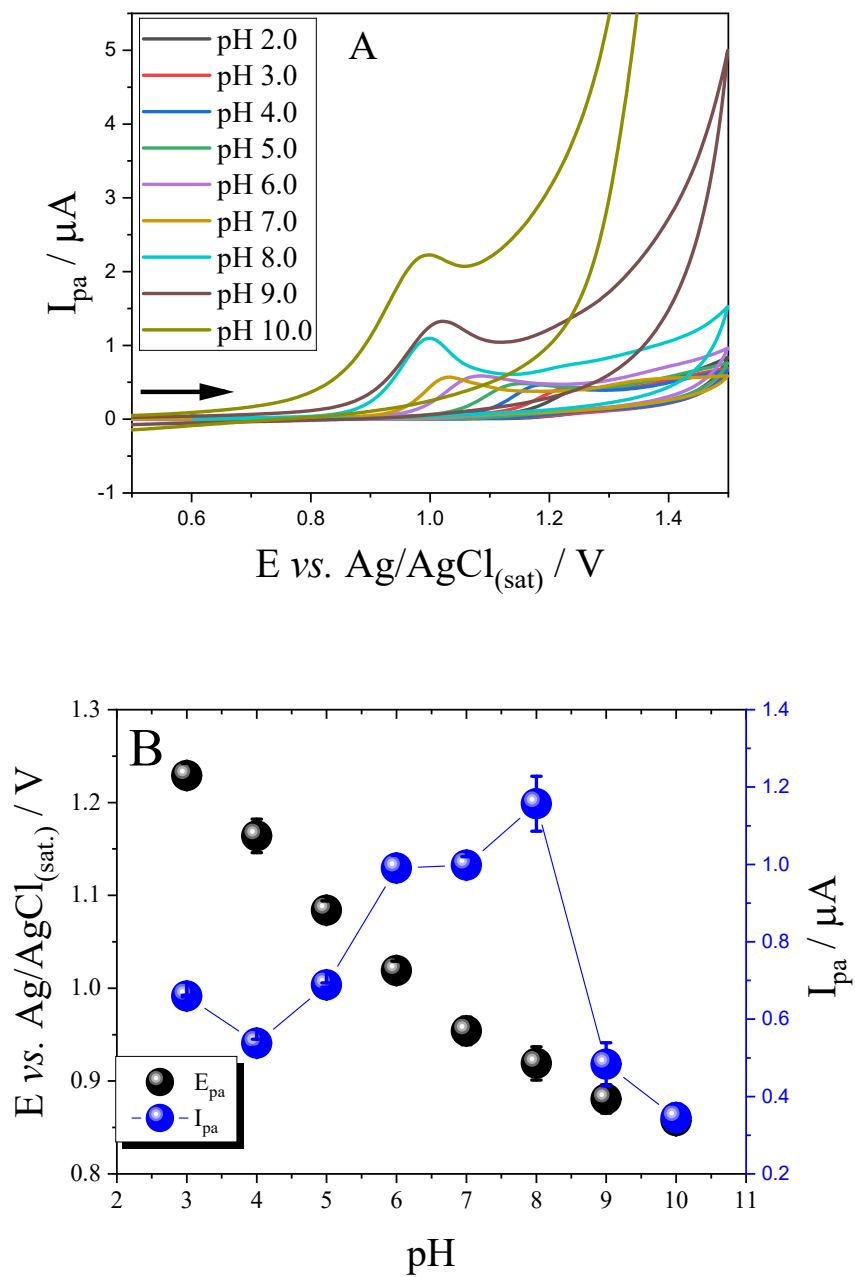

**Figure S1.** (A) Cyclic voltammograms for VIN 3.5 mg L<sup>-1</sup> on GCE in B-R buffer at different pH values (2.0 – 10.0); (B) Variation of peak intensity and anodic peak potentials as a function of supporting electrolyte pH.

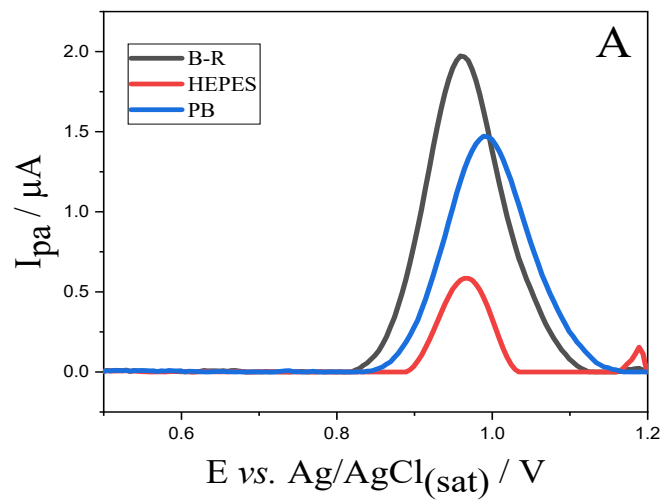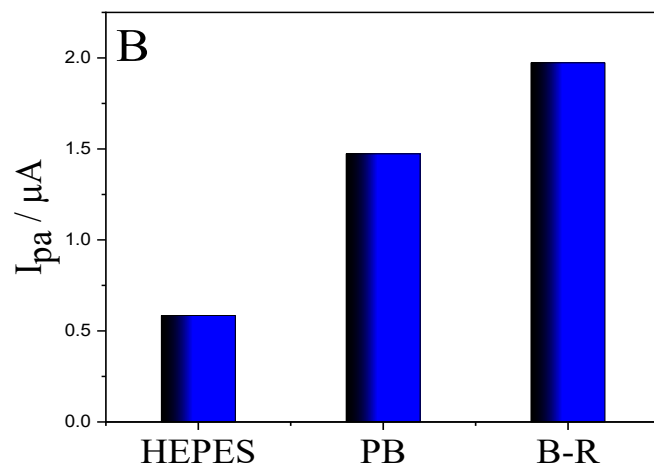

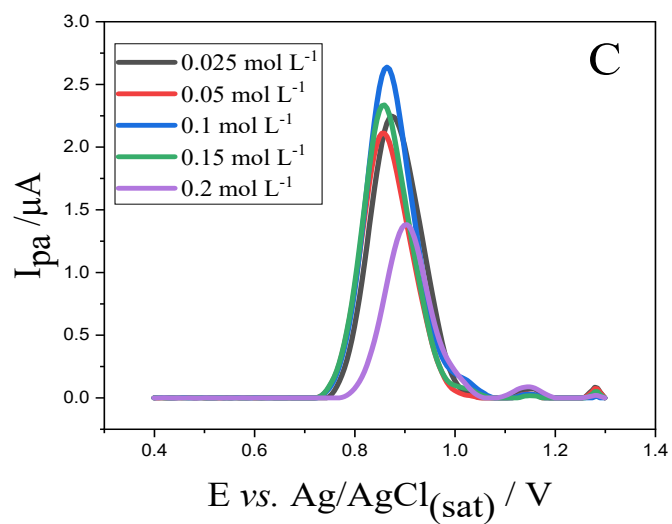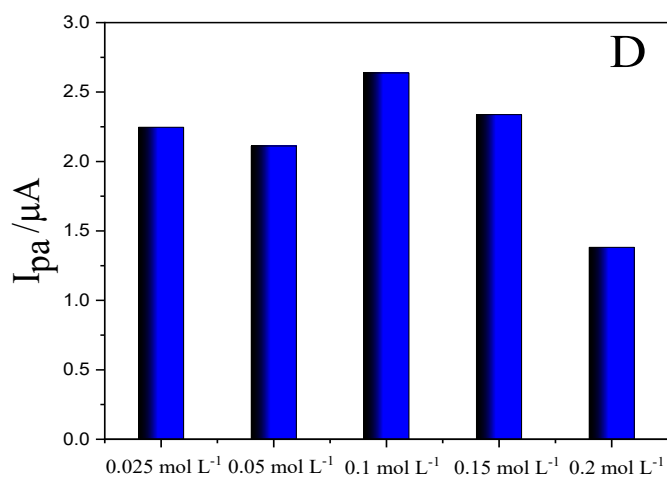

**Figure S2.** (A) DPV for VIN on GCE in different buffers HEPES, B-R, and PB pH 8.0, 0.1 mol L<sup>-1</sup>. (B) The anodic current intensities for VIN. (C) DPV for VIN on GCE at different concentrations, and (D) Shows the anodic current intensities for VIN versus B-R buffer concentrations at pH 8.0.

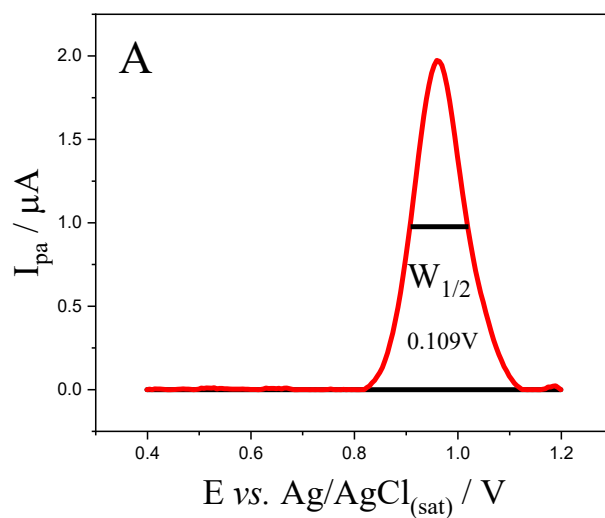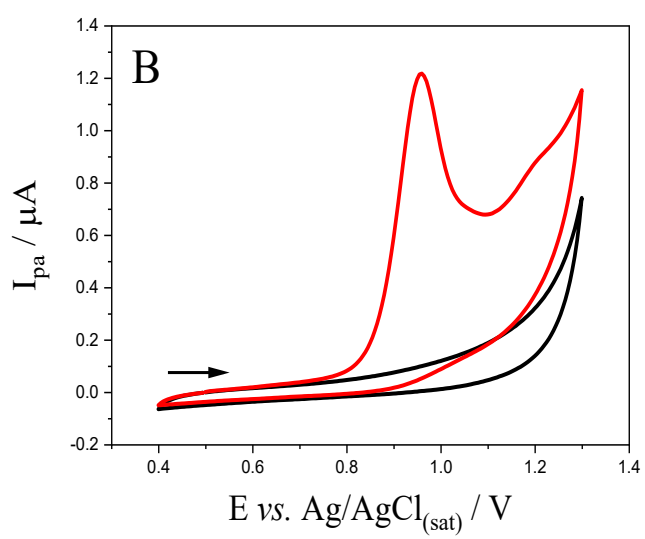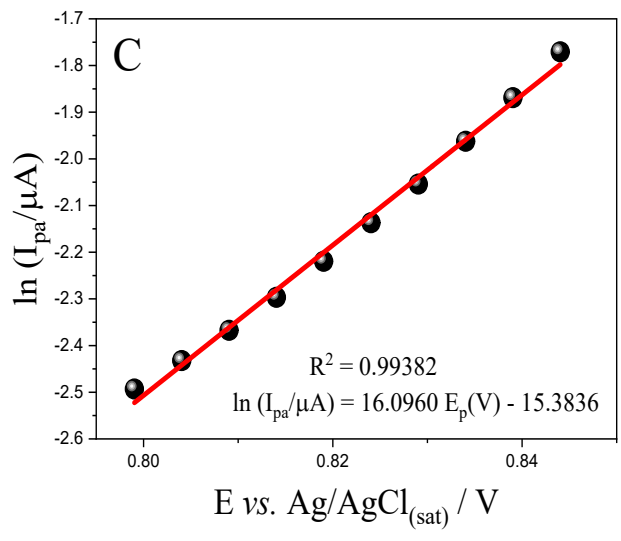

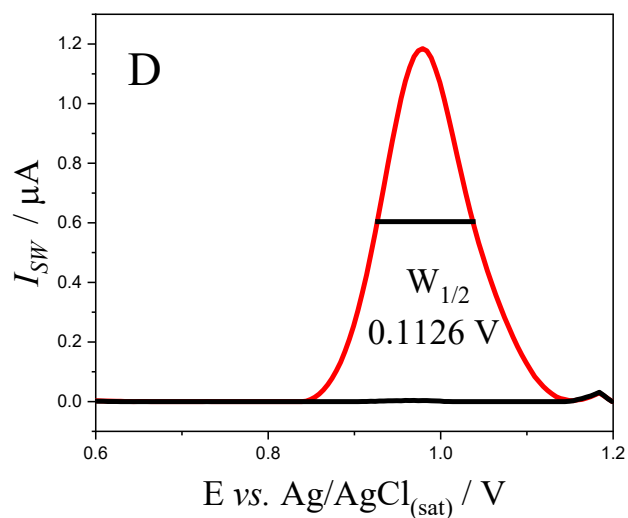

**Figure S3.** (A) DP voltammogram and the experimental determination of width at the mid-height ( $W_{1/2}$ ) of *ca.* 0.109 V. (B) Cyclic voltammograms for VIN (3.5 mg L<sup>-1</sup>, red) in B-R 0.1 mol L<sup>-1</sup> solution (pH 8.0, black),  $\nu = 50$  mV s<sup>-1</sup>, after baseline correction. (C) Tafel plot and the correspondent relation of  $\ln I_{pa}$  vs.  $E_{pa}$ . (D) SW voltammogram and the experimental determination of width at the mid-height ( $W_{1/2}$ ) of *ca.* 0.113 V.

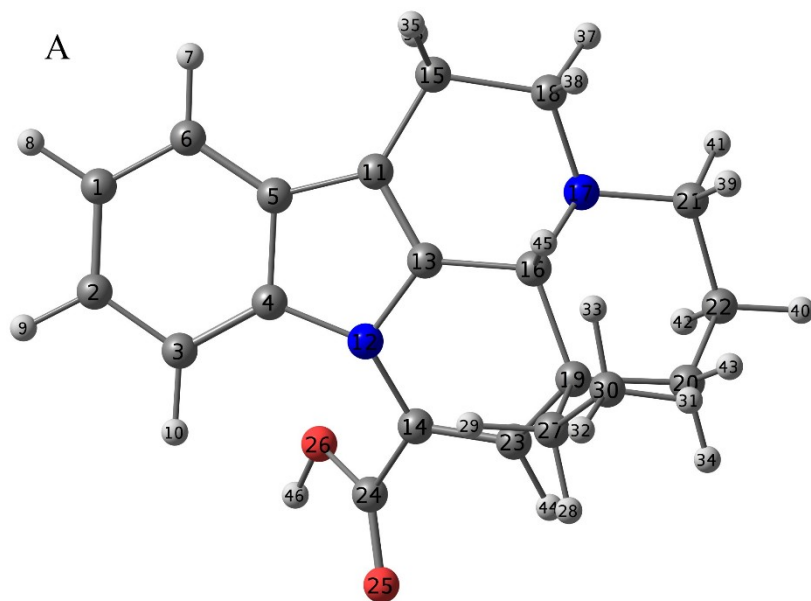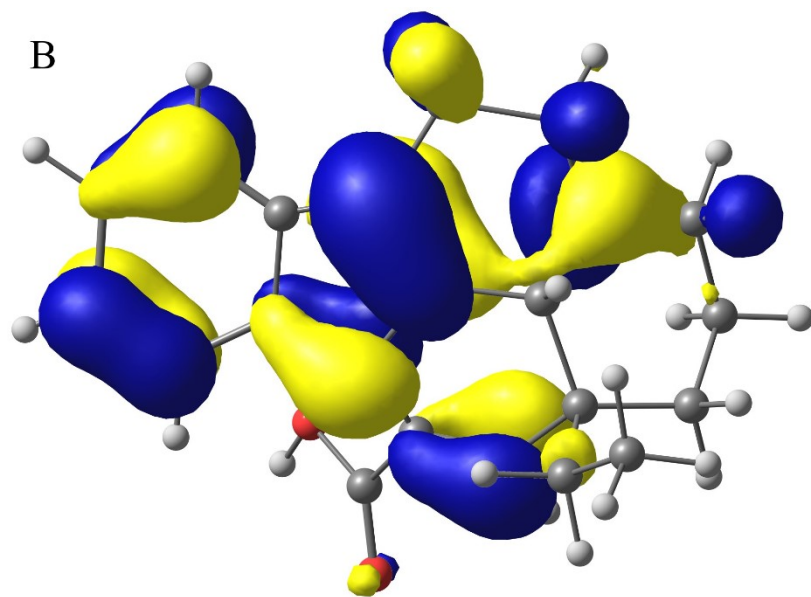

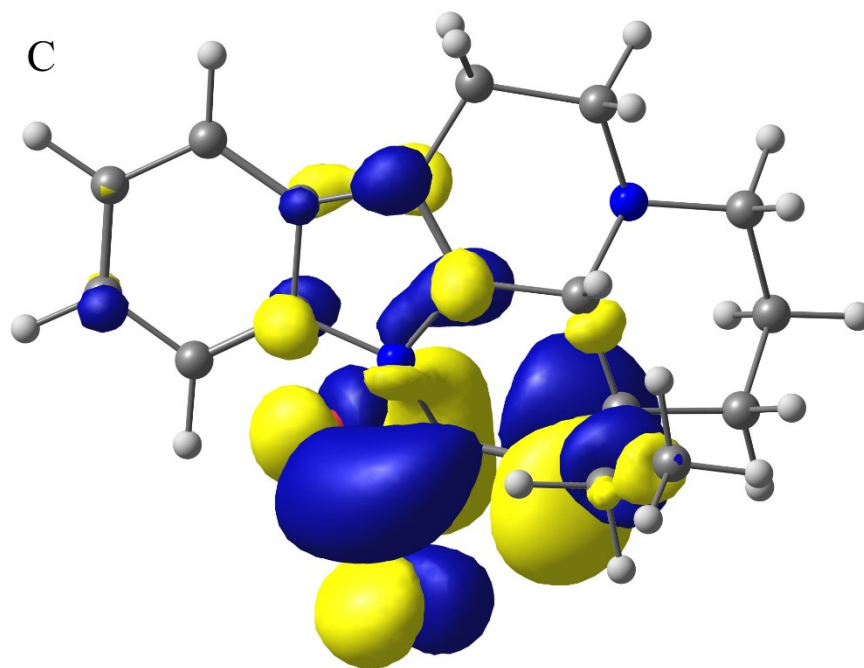

**Figure S4.** Labeled atoms (A), highest occupied molecular orbital (HOMO) (B), and lowest unoccupied molecular orbital (LUMO) (C) of VIN. The grey, white, blue, and red spheres represent the carbon, hydrogen, nitrogen, and oxygen atoms.

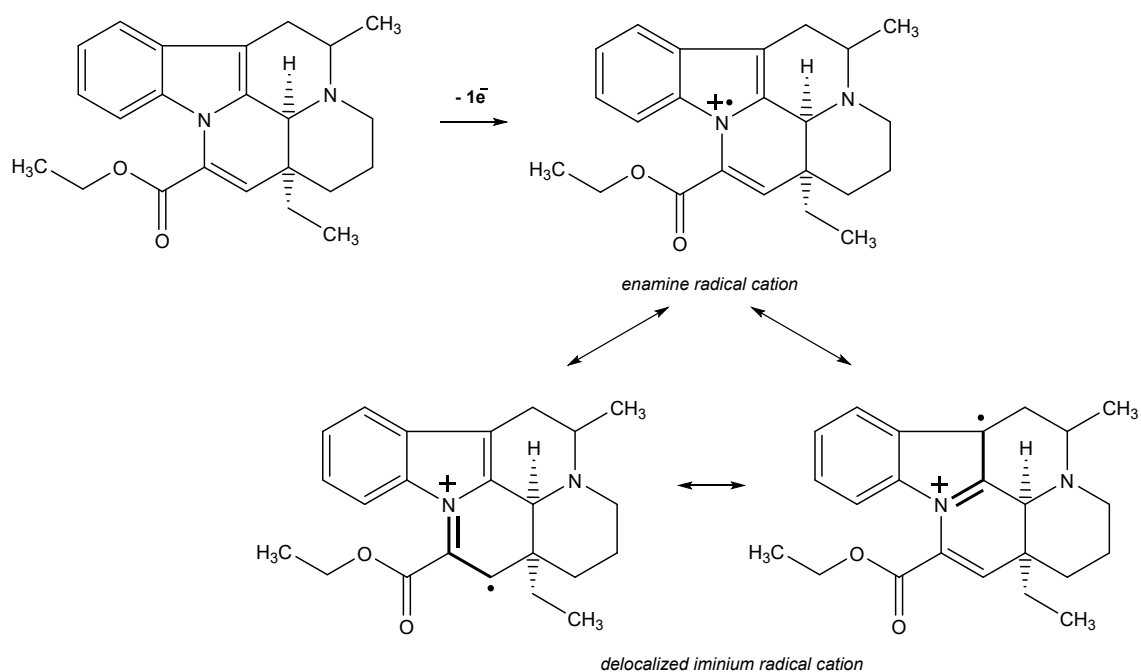

**Scheme 1.** Mechanism suggestion for VIN oxidation process.



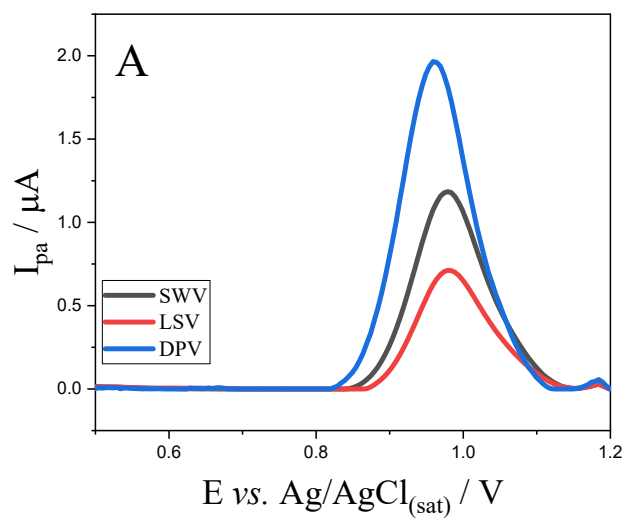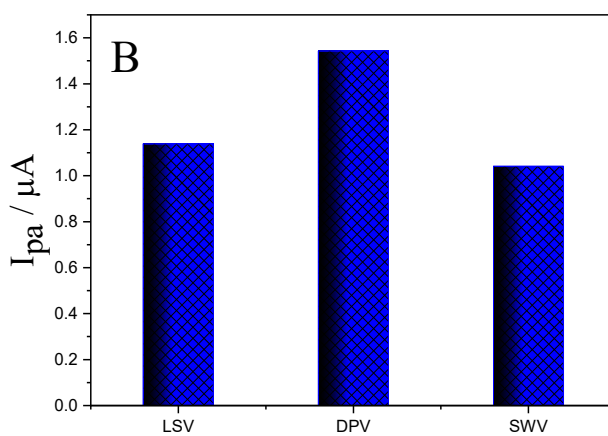

**Figure S5.** (A) Voltammograms obtained by LSV, DPV, and SWV for VIN  $3.5 \text{ mg L}^{-1}$  in B-R buffer solution  $0.1 \text{ mol L}^{-1}$  (pH 8.0) on GCE;  $v = 50 \text{ mVs}^{-1}$ , after baseline correction and (B) the correspondent data analysis.

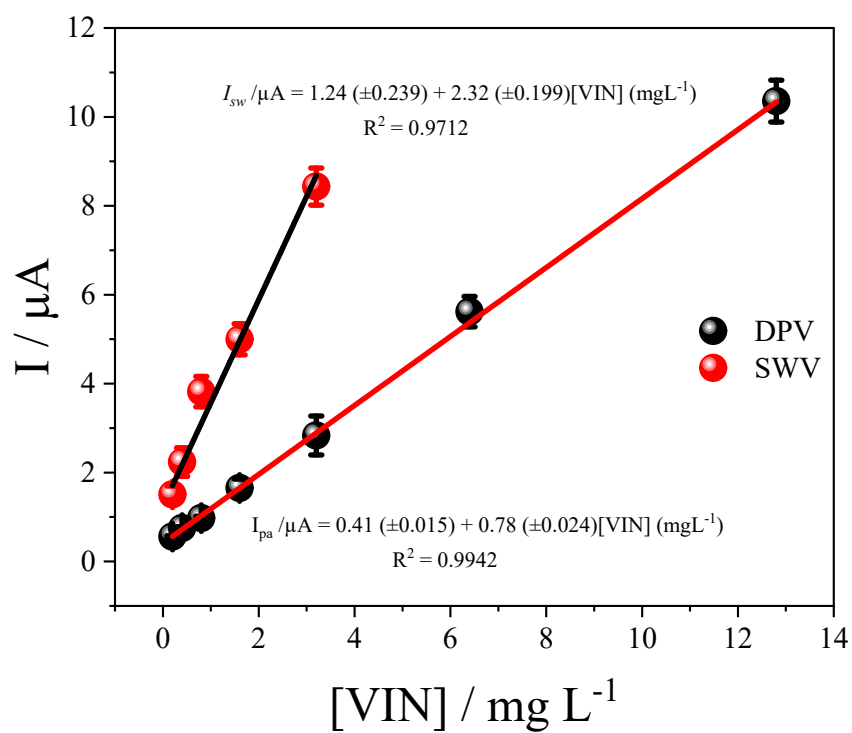

**Figure S6.** Relationship between the anodic peak current and the concentration of VIN for SWV (red dots) and DPV (black dots).

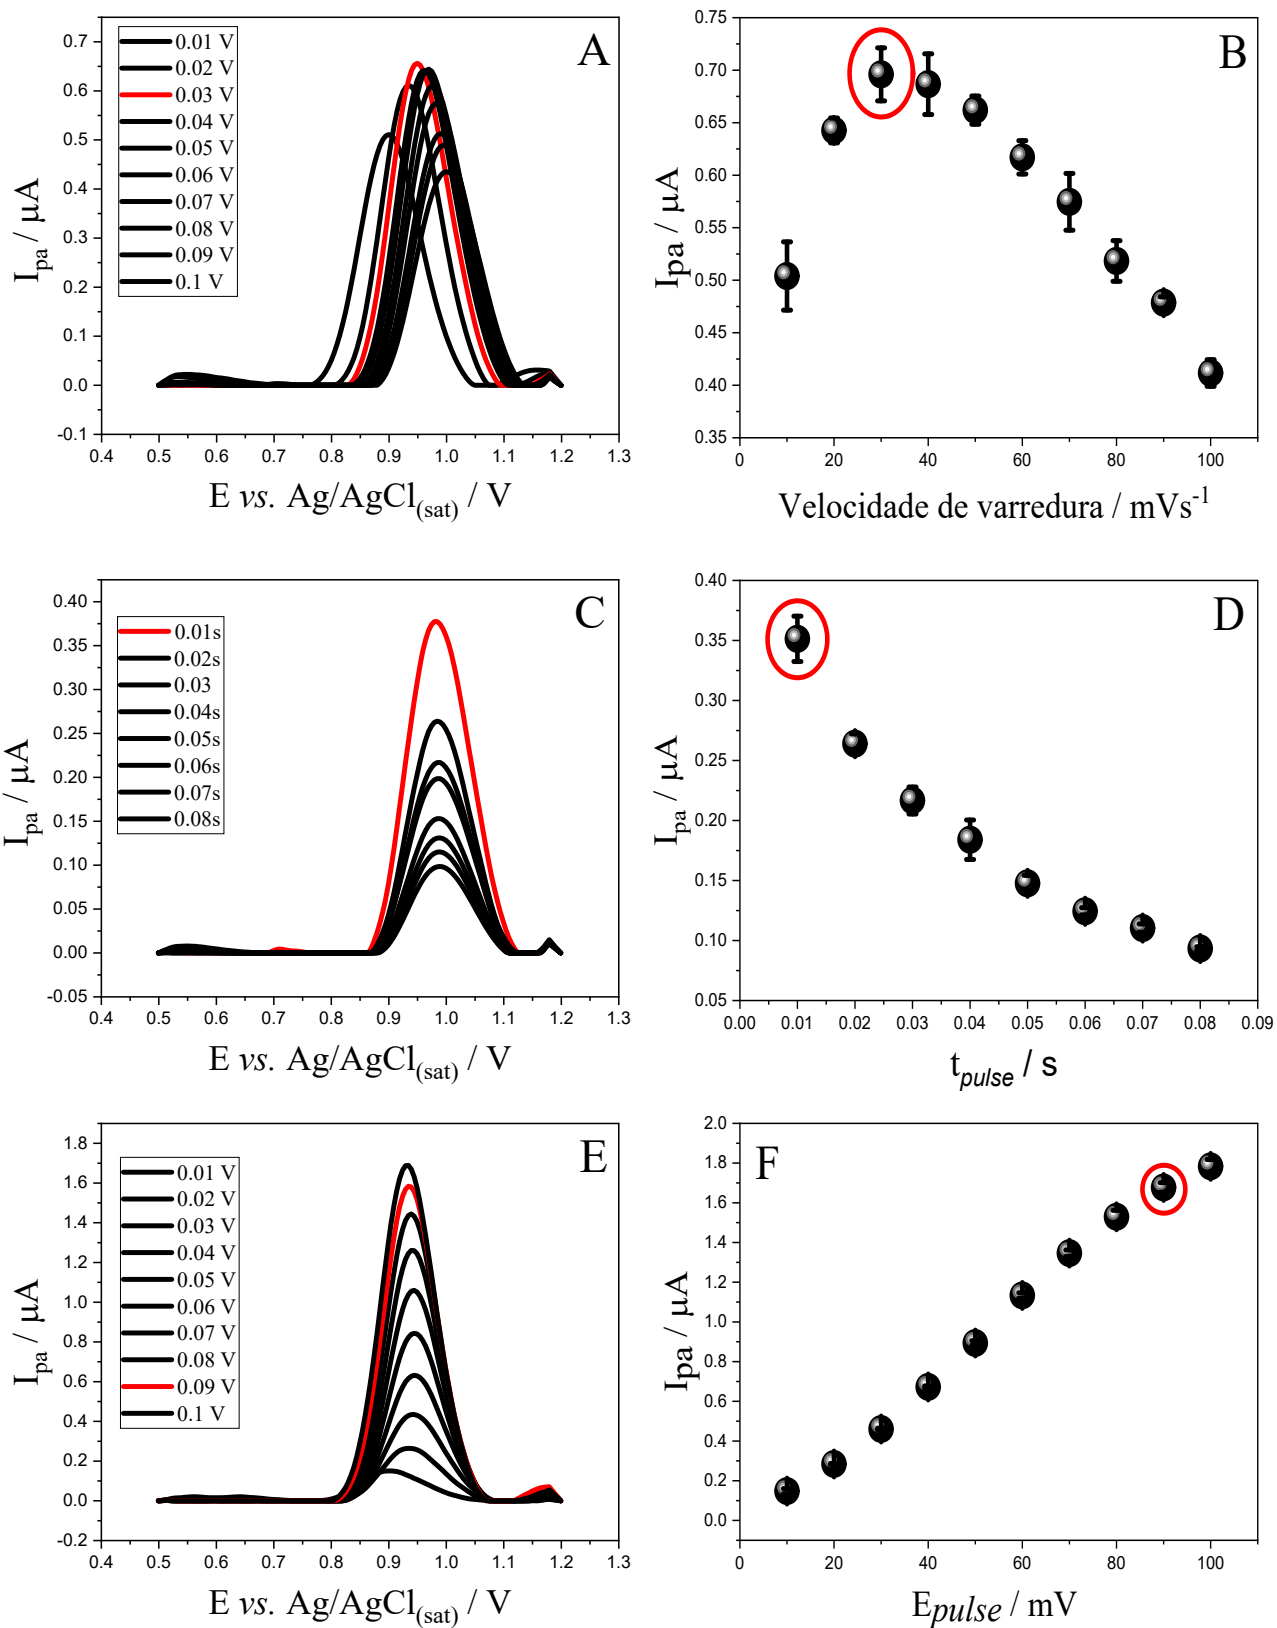

**Figure S7.** DP voltammograms for VIN using the GCE. (A) Variation of scan rate with (B) the correspondent data. (C) Variation of pulse time with (D) the correspondent data. (E) Variation

of pulse amplitude with (F) the correspondent data. Experimental conditions: BR-buffer 0.1 mol L<sup>-1</sup> pH 8.0 in the presence of 3.5 mg L<sup>-1</sup> of VIN.

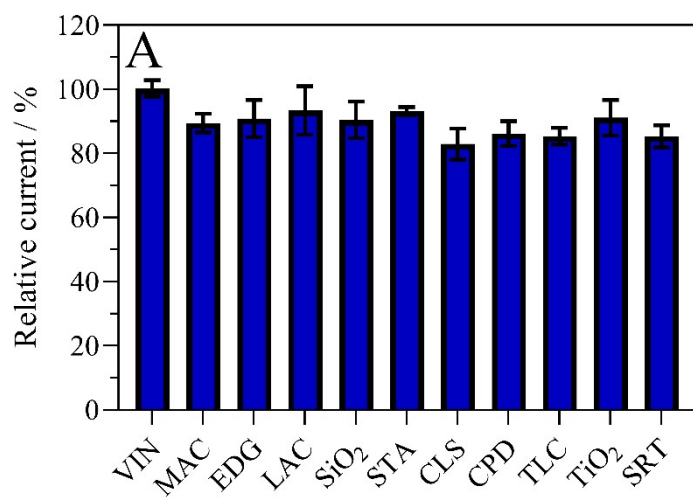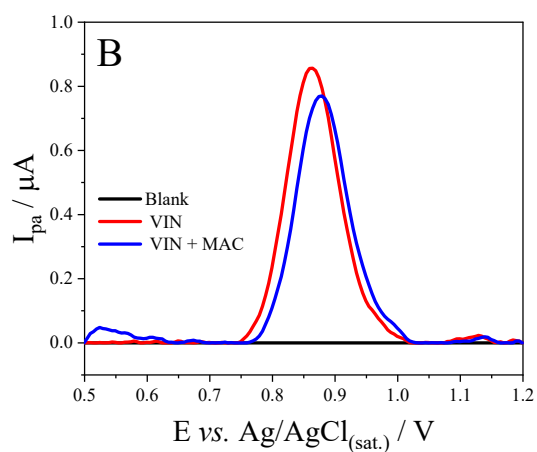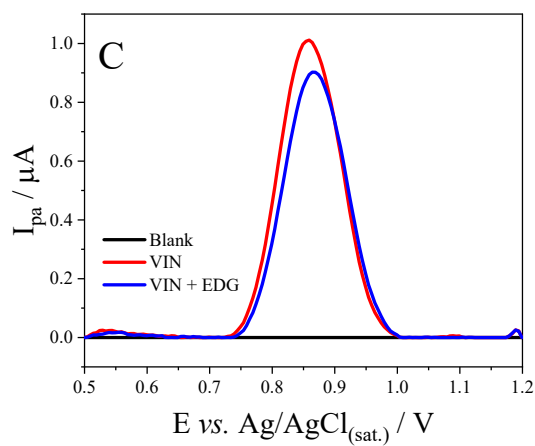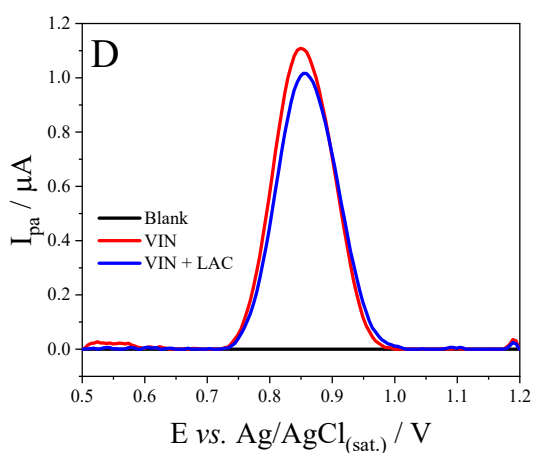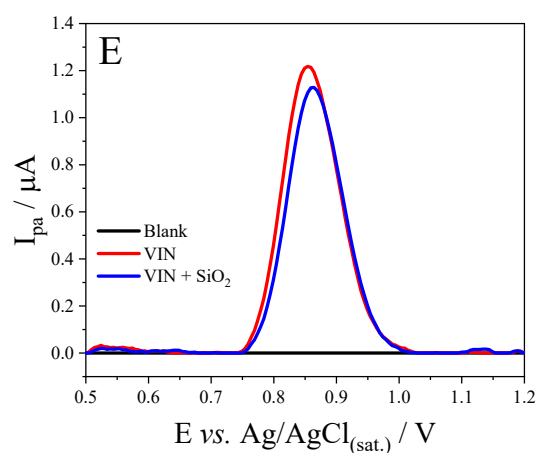

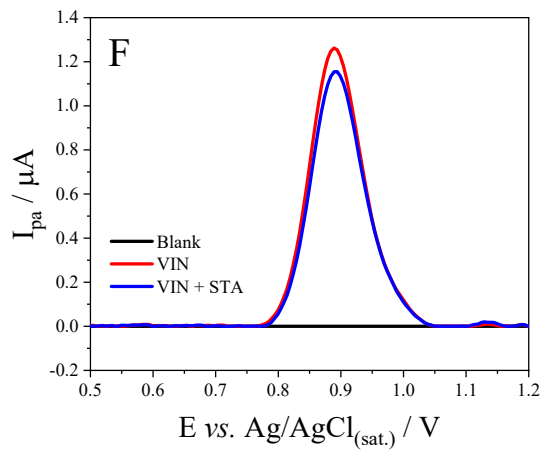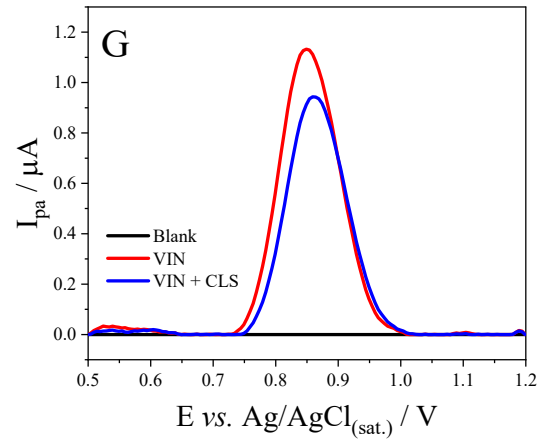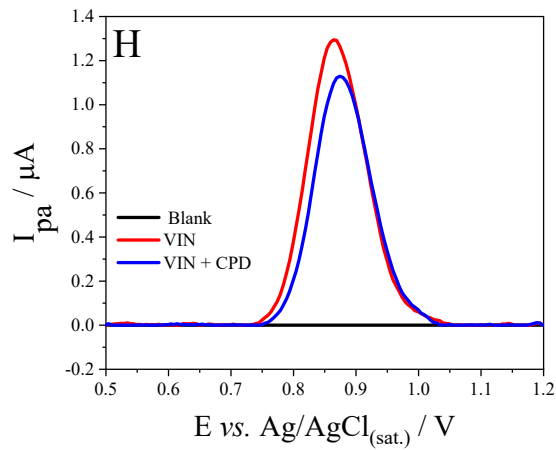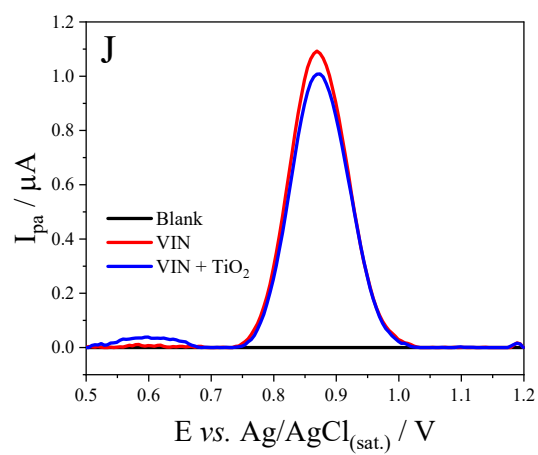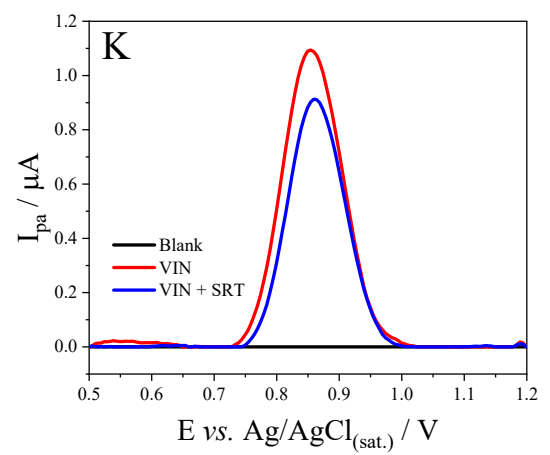

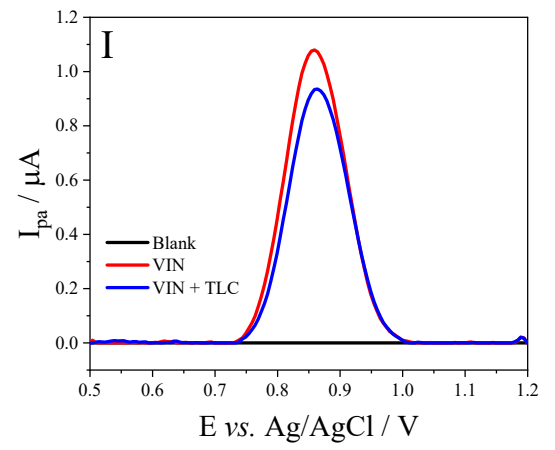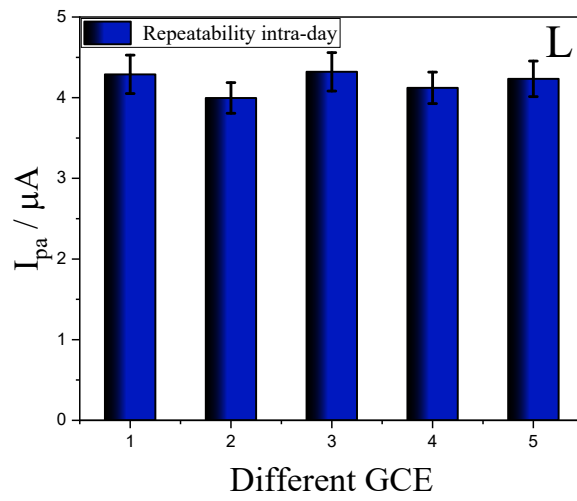

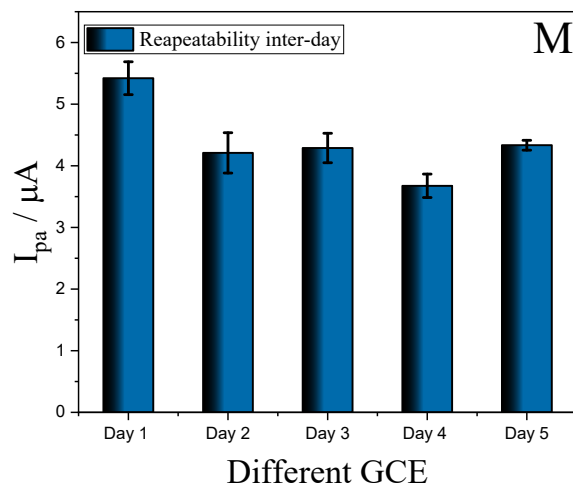

**Figure S8.** Selectivity and repeatability tests. (A) Peak current intensity using DPV for VIN, and in the presence of possible interferers macrogol (MAC), eudragit (EDG), lactose (LAC), silicon dioxide ( $SiO_2$ ), starch (STA), cellulose (CLS), crospovidone (CPD), talc (TLC), titanium dioxide ( $TiO_2$ ) and magnesium stearate (STR), (B-K) Comparative graph of VIN current intensity versus interfering potentials (VIN/Mac, VIN/EDG, VIN/LAC, VIN/ $SiO_2$ , VIN/STA, VIN/CLS, VIN/CPD, VIN/TLC, VIN/ $TiO_2$  and VIN/SRT), after baseline correction, (L) Peak current response for intra-day repeatability using GCE and (M) Peak current response for inter-day repeatability using GCE.



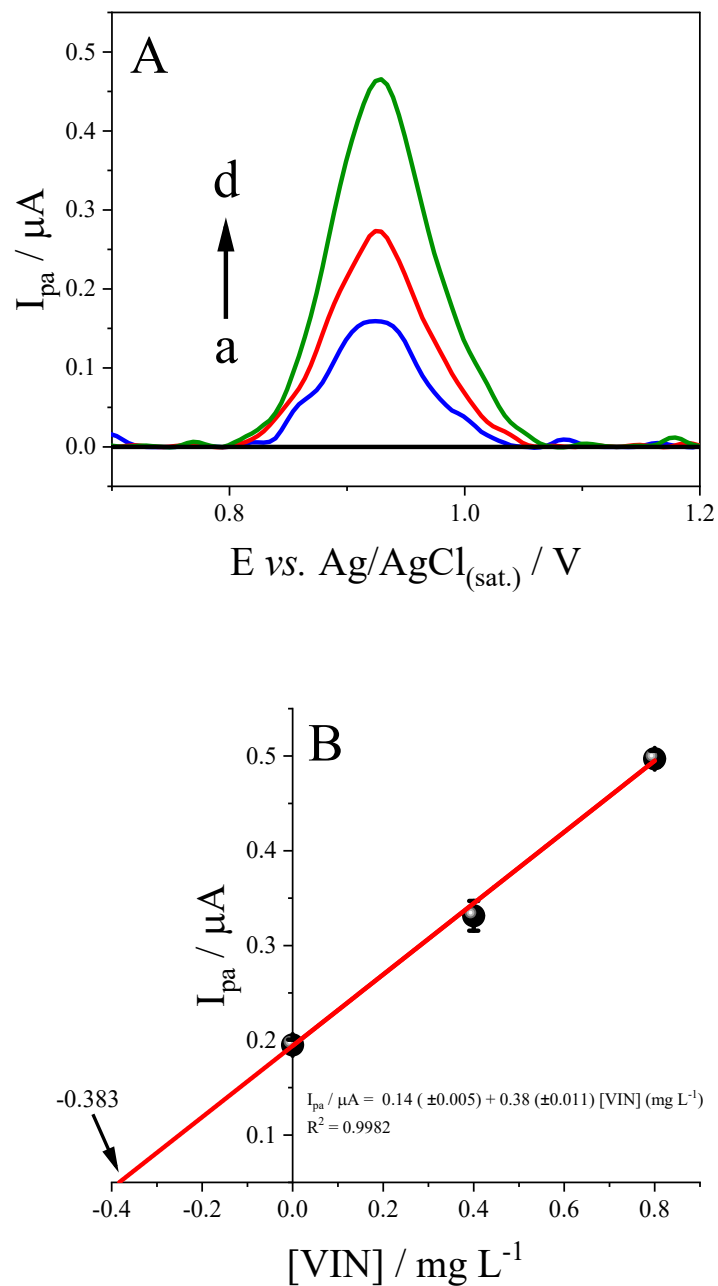

**Figure S9.** (A) DP voltammograms recorded using the GCE in the presence of VIN: (a) blank; (b) sample; (c-d) successive additions of 20  $\mu\text{L}$  of  $10^{-3} \text{ mol L}^{-1}$  VIN standard solution in  $0.1 \text{ mol L}^{-1}$  B-R buffer solution (pH 8.0), baseline corrected. (B) Calibration curve for the relationship between anodic peak current and VIN concentration based on the standard addition method.

**Table S1.** Hirshfeld charges ( $q$ ), condensed Fukui functions ( $f^-$ ,  $f^+$ , and  $f^0$ ), and condensed dual descriptor ( $\Delta f$ ) for all VIN atoms. The  $N$ ,  $(N + 1)$ , and  $(N - 1)$  represent the ground, oxidized, and reduced states of VIN, respectively. All the charge values are expressed in atomic units.

| Atom   | $q(N)$  | $q(N + 1)$ | $q(N - 1)$ | $f^-$  | $f^+$   | $f^0$  | $\Delta f$ |
|--------|---------|------------|------------|--------|---------|--------|------------|
| 1 (C)  | -0.0552 | -0.0895    | -0.0218    | 0.0335 | 0.0343  | 0.0339 | 0.0008     |
| 2 (C)  | -0.0535 | -0.0974    | -0.0028    | 0.0507 | 0.0439  | 0.0473 | -0.0068    |
| 3 (C)  | -0.0574 | -0.072     | -0.0261    | 0.0313 | 0.0146  | 0.0229 | -0.0167    |
| 4 (C)  | 0.0257  | 0.0149     | 0.0425     | 0.0168 | 0.0108  | 0.0138 | -0.006     |
| 5 (C)  | -0.0236 | -0.046     | -0.0142    | 0.0095 | 0.0224  | 0.0159 | 0.0129     |
| 6 (C)  | -0.0503 | -0.083     | -0.0095    | 0.0408 | 0.0327  | 0.0367 | -0.0081    |
| 7 (H)  | 0.0385  | 0.016      | 0.0603     | 0.0218 | 0.0225  | 0.0221 | 0.0007     |
| 8 (H)  | 0.0369  | 0.0122     | 0.0627     | 0.0258 | 0.0247  | 0.0252 | -0.0011    |
| 9 (H)  | 0.0373  | 0.009      | 0.0645     | 0.0272 | 0.0284  | 0.0278 | 0.0012     |
| 10 (H) | 0.0363  | 0.0239     | 0.0517     | 0.0155 | 0.0124  | 0.0139 | -0.0031    |
| 11 (C) | -0.0369 | -0.0775    | 0.0134     | 0.0504 | 0.0406  | 0.0455 | -0.0098    |
| 12 (N) | -0.0011 | 0.0005     | 0.0287     | 0.0298 | -0.0016 | 0.0141 | -0.0314    |
| 13 (C) | 0.0187  | -0.0027    | 0.0488     | 0.0301 | 0.0214  | 0.0257 | -0.0087    |
| 14 (C) | 0.0242  | -0.0403    | 0.0328     | 0.0086 | 0.0645  | 0.0366 | 0.0559     |
| 15 (C) | -0.0474 | -0.0583    | -0.0333    | 0.0141 | 0.0109  | 0.0125 | -0.0032    |
| 16 (C) | 0.0147  | 0.0159     | 0.0295     | 0.0148 | -0.0012 | 0.0068 | -0.016     |
| 17 (N) | -0.0839 | -0.0768    | 0.0088     | 0.0927 | -0.0071 | 0.0428 | -0.0998    |
| 18 (C) | -0.01   | -0.0158    | 0.0097     | 0.0196 | 0.0058  | 0.0127 | -0.0138    |
| 19 (C) | 0.0175  | 0.0113     | 0.0199     | 0.0024 | 0.0062  | 0.0043 | 0.0038     |
| 20 (C) | -0.0521 | -0.0584    | -0.0457    | 0.0064 | 0.0063  | 0.0063 | -0.0001    |
| 21 (C) | -0.0166 | -0.0206    | 0.0053     | 0.0219 | 0.004   | 0.0129 | -0.0179    |
| 22 (C) | -0.0555 | -0.0602    | -0.0458    | 0.0097 | 0.0047  | 0.0072 | -0.005     |
| 23 (C) | -0.0421 | -0.1294    | -0.0141    | 0.028  | 0.0873  | 0.0576 | 0.0593     |

---

|        |         |         |         |        |        |        |         |
|--------|---------|---------|---------|--------|--------|--------|---------|
| 24 (C) | 0.1796  | 0.1094  | 0.1857  | 0.0061 | 0.0701 | 0.0381 | 0.064   |
| 25 (O) | -0.2604 | -0.344  | -0.2252 | 0.0352 | 0.0836 | 0.0594 | 0.0484  |
| 26 (O) | -0.1406 | -0.1791 | -0.1324 | 0.0082 | 0.0385 | 0.0233 | 0.0303  |
| 27 (C) | -0.045  | -0.0556 | -0.0382 | 0.0068 | 0.0106 | 0.0087 | 0.0038  |
| 28 (H) | 0.0331  | 0.0215  | 0.047   | 0.0139 | 0.0115 | 0.0127 | -0.0024 |
| 29 (H) | 0.0303  | 0.0261  | 0.0372  | 0.0069 | 0.0042 | 0.0055 | -0.0027 |
| 30 (C) | -0.0877 | -0.1025 | -0.0795 | 0.0082 | 0.0148 | 0.0115 | 0.0066  |
| 31 (H) | 0.0297  | 0.0167  | 0.0409  | 0.0112 | 0.013  | 0.0121 | 0.0018  |
| 32 (H) | 0.0372  | 0.0144  | 0.0528  | 0.0155 | 0.0229 | 0.0192 | 0.0074  |
| 33 (H) | 0.0277  | 0.0185  | 0.0316  | 0.0039 | 0.0093 | 0.0066 | 0.0054  |
| 34 (H) | 0.0335  | 0.0228  | 0.05    | 0.0165 | 0.0107 | 0.0136 | -0.0058 |
| 35 (H) | 0.0345  | 0.0127  | 0.0594  | 0.025  | 0.0218 | 0.0234 | -0.0032 |
| 36 (H) | 0.0374  | 0.0261  | 0.0635  | 0.0261 | 0.0114 | 0.0187 | -0.0147 |
| 37 (H) | 0.0355  | 0.0176  | 0.0569  | 0.0213 | 0.0179 | 0.0196 | -0.0034 |
| 38 (H) | 0.012   | -0.0044 | 0.0503  | 0.0383 | 0.0164 | 0.0273 | -0.0219 |
| 39 (H) | 0.0134  | -0.0097 | 0.0493  | 0.0359 | 0.0232 | 0.0295 | -0.0127 |
| 40 (H) | 0.0349  | 0.0178  | 0.0566  | 0.0217 | 0.017  | 0.0194 | -0.0047 |
| 41 (H) | 0.0343  | 0.0187  | 0.055   | 0.0206 | 0.0157 | 0.0181 | -0.0049 |
| 42 (H) | 0.0304  | 0.0255  | 0.0377  | 0.0073 | 0.0049 | 0.0061 | -0.0024 |
| 43 (H) | 0.0281  | 0.0132  | 0.0402  | 0.0121 | 0.0149 | 0.0135 | 0.0028  |
| 44 (H) | 0.0427  | 0.0062  | 0.0607  | 0.0181 | 0.0365 | 0.0273 | 0.0184  |
| 45 (H) | 0.0214  | 0.0117  | 0.043   | 0.0215 | 0.0097 | 0.0156 | -0.0118 |
| 46 (H) | 0.1743  | 0.1404  | 0.192   | 0.0177 | 0.0339 | 0.0258 | 0.0162  |

---

| VIN                                 | VIN-OXI                             | VIN-RED                             |
|-------------------------------------|-------------------------------------|-------------------------------------|
| Energy = -1035.707276876883 Hartree | Energy = -1035.466782841832 Hartree | Energy = -1035.700179194273 Hartree |
| Negative Frequency = none           | Negative Frequency = none           | Negative Frequency = none           |
| C -3.189412 -2.146459 3.573591      | C -3.178377 -1.867663 3.509709      | C -3,150355 -2,096008 3,709667      |
| C -3.297412 -3.142816 2.586327      | C -3.328331 -2.727415 2.412771      | C -3,314790 -3,020093 2,656181      |
| C -2.175077 -3.602029 1.894635      | C -2.222929 -3.212589 1.689774      | C -2,236258 -3,426637 1,866789      |
| C -0.938859 -3.034536 2.206059      | C -0.962261 -2.802340 2.093835      | C -0,967399 -2,893140 2,123406      |
| C -0.802971 -2.053675 3.236256      | C -0.784997 -1.968405 3.243459      | C -0,776320 -1,998558 3,247105      |
| C -1.950288 -1.604342 3.909433      | C -1.908893 -1.486029 3.939238      | C -1,888526 -1,593793 4,011500      |
| H -1.870103 -0.854621 4.697740      | H -1.786752 -0.843442 4.811089      | H -1,751356 -0,913040 4,855363      |
| H -4.086200 -1.809787 4.094576      | H -4.060876 -1.511676 4.039218      | H -4,014522 -1,792331 4,304803      |
| H -4.273432 -3.572719 2.360188      | H -4.327446 -3.033904 2.104597      | H -4,304114 -3,433769 2,451009      |
| H -2.273053 -4.386210 1.146118      | H -2.377328 -3.883120 0.850215      | H -2,384368 -4,131780 1,056004      |
| C 0.606394 -1.773708 3.373833       | C 0.621220 -1.852987 3.463883       | C 0,625587 -1,785624 3,366357       |
| N 0.350336 -3.316017 1.711943       | N 0.339216 -3.152112 1.615058       | N 0,294859 -3,143932 1,543958       |
| C 1.256565 -2.600021 2.507466       | C 1.242959 -2.650332 2.507368       | C 1,222377 -2,545216 2,387425       |
| C 0.779095 -3.689782 0.421592       | C 0.811721 -3.717809 0.410467       | C 0,757267 -3,610274 0,262366       |

---

C 1.345893 -0.646812 4.033226  
C 2.731502 -2.572469 2.287755  
N 3.033282 -1.120897 2.177692  
C 2.808894 -0.521653 3.502568  
C 3.193395 -3.527898 1.141826  
C 4.498568 -3.028053 0.482412  
C 4.364791 -0.828535 1.657933  
C 4.548392 -1.508866 0.304316  
C 2.098176 -3.723289 0.124438  
C -0.164734 -3.871688 -0.726488  
O -0.043017 -4.727954 -1.582419  
O -1.132690 -2.915531 -0.772956  
C 3.407554 -4.968913 1.746013  
H 3.567489 -5.650274 0.895812  
H 2.454727 -5.279563 2.201312  
C 4.539954 -5.168854 2.759834  
H 5.532701 -4.993222 2.325051

C 1.506520 -1.060557 4.364245  
C 2.730884 -2.739108 2.415716  
N 3.035567 -1.292588 2.361239  
C 2.732564 -0.523954 3.571242  
C 3.228520 -3.649151 1.253022  
C 4.454161 -3.024550 0.550919  
C 4.034284 -0.735643 1.463113  
C 4.202630 -1.559964 0.192087  
C 2.142181 -3.899994 0.240580  
C -0.061824 -3.983093 -0.783598  
O 0.116652 -4.910385 -1.541174  
O -0.996125 -3.014389 -0.970549  
C 3.568463 -5.070435 1.838470  
H 3.724055 -5.744716 0.983234  
H 2.669134 -5.444746 2.352717  
C 4.777090 -5.160516 2.774746  
H 5.722661 -4.949987 2.260092

C 1,510918 -0,898016 4,184620  
C 2,703321 -2,536719 2,249445  
N 3,030639 -1,088896 2,110817  
C 2,729428 -0,354935 3,351629  
C 3,188454 -3,505394 1,138838  
C 4,553817 -3,055045 0,572761  
C 4,360672 -0,792534 1,614630  
C 4,621344 -1,548585 0,313499  
C 2,155489 -3,583578 0,050764  
C -0,061739 -3,911697 -0,873812  
O 0,359107 -4,358210 -1,965707  
O -1,432603 -3,596915 -0,805515  
C 3,328352 -4,947926 1,764513  
H 3,513903 -5,626843 0,916655  
H 2,334666 -5,224184 2,150246  
C 4,381837 -5,205003 2,854747  
H 5,407588 -5,036641 2,495528

---

---

|                                 |                                 |                                 |
|---------------------------------|---------------------------------|---------------------------------|
| H 4.524173 -6.207146 3.119939   | H 4.847319 -6.179897 3.176083   | H 4,326368 -6,250941 3,197156   |
| H 4.438933 -4.521194 3.641502   | H 4.702215 -4.483086 3.637731   | H 4,232497 -4,568029 3,738987   |
| H 4.634113 -3.547134 -0.479192  | H 4.690006 -3.616174 -0.345218  | H 4,752982 -3,623257 -0,350238  |
| H 1.377207 -0.735525 5.131137   | H 1.852547 -1.704407 5.192408   | H 1,911113 -1,435234 5,064039   |
| H 0.793949 0.283419 3.821363    | H 0.979796 -0.222017 4.835371   | H 0,946617 -0,044236 4,589283   |
| H 3.083224 0.540853 3.439361    | H 2.530506 0.509012 3.251795    | H 2,552018 0,697745 3,074243    |
| H 3.499719 -0.987765 4.242910   | H 3.626412 -0.484019 4.224576   | H 3,622547 -0,357455 4,022054   |
| H 5.172926 -1.162827 2.353193   | H 5.009546 -0.692398 1.995138   | H 5,159390 -1,051396 2,360191   |
| H 5.514466 -1.215428 -0.131952  | H 5.045736 -1.147723 -0.377274  | H 5,611251 -1,270465 -0,083683  |
| H 4.455279 0.264515 1.565861    | H 3.753713 0.305008 1.240222    | H 4,428670 0,297940 1,457296    |
| H 3.757452 -1.164668 -0.380027  | H 3.307431 -1.463694 -0.442665  | H 3,861056 -1,262646 -0,428987  |
| H 5.353780 -3.315962 1.112489   | H 5.332738 -3.089421 1.210249   | H 5,358657 -3,309338 1,284148   |
| H 2.373049 -3.992039 -0.895305  | H 2.448043 -4.334316 -0.712000  | H 2,478494 -3,900321 -0,939871  |
| H 3.231174 -2.944842 3.210395   | H 3.142199 -3.148099 3.357044   | H 3,145682 -2,886329 3,214126   |
| H -1.661276 -3.112726 -1.572406 | H -1.463923 -3.234828 -1.802890 | H -1,715988 -3,840386 -1,706983 |

---
